# Supplementary material
Source: PubMed Central journal article supplement (PMC4677910)
Supplement: supp_pp.15.01192_PP2015-01192R1_Supplemental_Material_tbl2.pdf [file supp_pp.15.01192_PP2015-01192R1_Supplemental_Material_tbl2.pdf]

1 **Table SII: Primers used for RT-qPCR gene expression studies**

2

| Name            | Gene       | Function                                        | Forward                    | Reverse                      | Reference                                          |
|-----------------|------------|-------------------------------------------------|----------------------------|------------------------------|----------------------------------------------------|
| <i>Actin</i>    | Os03g50890 | Actin                                           | GCGTGGACAAAGTTTTCAA<br>CCG | TCTGGTACCCTCATCAGGCAT<br>C   | -                                                  |
| <i>CHI7</i>     | Os06g51050 | chitinase                                       | CAATGCACACGAGATTGTG<br>A   | CCGCATTGTGTTAACGTCCA         | Kaku et al, 2006                                   |
| <i>PR5</i>      | Os08g04580 | CsAtPR5, putative, expressed                    | TTGGCTTCTGTCTGCTTGA<br>A   | AGCTGCATCAACCATGCTAA         | -                                                  |
| <i>EXP</i>      | Os06g11070 | Expressed protein                               | TCCATCTGCTCCCGTTGTT<br>GTG | AAAGAGTTCGCCACCAACCGT<br>C   | (Caldana et al., 2007)                             |
| <i>NHI</i>      | Os01g09800 | Regulatory protein NPR1,<br>putative, expressed | CCTGATGGTTGCCTTCTGT<br>C   | ATTCAAGCACTTGTATTACAC<br>CTC | (Chern et al., 2005)                               |
| <i>OsFLS2</i>   |            |                                                 |                            |                              |                                                    |
| <i>OsMADS26</i> | Os08g02070 | Transcription factor activity                   | GCTCGGAGATGGCTATTCCTTC     | GACTTCCTGCGGGAACCTG<br>TC    | (Shinozuka et al., 1999)                           |
| <i>PBZ1</i>     | Os12g36880 | Probenazole induced protein<br>PBZ1/PR10        | CCGGGCACCATCTACACC         | CCTCGATCATCTTGAGCATGC        | (Midoh and Iwata, 1996; Swarbrick<br>et al., 2008) |
| <i>POX223</i>   | Os07g48020 | Peroxidase 2 precursor,<br>putative, expressed  | ACGACGCCAACGCCTTC          | CTTCCAGCAACGAACGCATCC        | (Vergne et al., 2007)                              |
| <i>Rab21</i>    | AK109096   | Rice dehydrin                                   | TGTGTGATCGGTGTTTCGA<br>T   | CCACACGCGCACTTACATAC         | (Claes et al., 1990; Quilis et al.,<br>2008)       |
| <i>Salt</i>     | AF001395   | Salt-stress-induced protein                     | CCCCATTGTCTGTGTACGT<br>G   | GGGATTAGTTGCCCATGGAT         | (Oh et al., 2005; Quilis et al., 2008)             |
| <i>WRKY28</i>   |            | Os06g44010                                      | CGCCGATGAACTTTGCTC         | CCACCTTGGCACGTGTAGA          | Delteil et al, 2012                                |

3
