# Supplementary material
Source: PubMed Central journal article supplement (PMC4677910)
Supplement: supp_pp.15.01192_ppPP201501192_revFIGS7.pdf [file supp_pp.15.01192_ppPP201501192_revFIGS7.pdf]

**GST1** { gtaagcaagagatagggataaggg**GAAGAGGAGGAAGAAGGAGG**gaggtgtagggaga  
**aaccggagcaacctcgaagctagtc**caaactagtgggaggtgtctttccggcaagccggagc  
**ccatagctaggtagacaggaggagaggaggaagaagaggggg**gagaggagacttatcttgatcg**ATG**gcg  
 cgaggcaaggtgcagctccgtcgcacgcagaaccgggtc**ACCGTCAGGTCACCTTCTGCAA**  
 gcgccgtgccggcctgctgaagaaggccaggagctctccatcctctgcgaggccgacatcggcacatcat  
 cttctccgccacggcaagctctacacctcgccaccaccggaacatggaggagctgatcgagaggtacaa  
 gagtgctagtggcgaacaggccaacgcctgcggcgaccagagaatggacccaaaacaggaggcaatggt  
 gtcacaacaagaaatcaatctactgcagaaggcctgaggtacatctatgggaacagggcaaataacaca  
 tgactgttgaagagctgaatgcctagagaggtacttagagatatggatgtac**AACATTCGCTCCGC**  
**AAAGATGC**agataatgatccaagagatccaagcactaaagagcaaggaagggcatgttgaaagctgcta  
**acgaaattctccaagaaaagatagtagaacagaatggctgatcgcagtaggcatgatggtagcagatcaac**  
**agaatgggcatttagtacagtc**ccactgttagaagagatcacta**accactgactatactgagtggctattcta**  
**ctttaggggctcggagatgggctattccttcTAA**cactaataatggcctgggggatacttgtgttcattacta  
 gtgtgtaatatggtaataatgcttgtgttctgtttgctttgctattctgatgtacctatttagacaagttccg  
**caggaagtgtcttttagtattgtattgtcttgggctgtggtgctttgttttcc****CTAAAGAACTCTT**  
**GAGGAGC**tctgttgtgaaccatttcaagtaattgagactattgtttcc

**GST2** {

**Primers used for *OsMADS26* cDNA amplification**

Forward: 5'-gaagaggaggaagaaggagg -3'

Reverse: 5'-gctcctcaagagttctttag -3'

**Primers used for GST1 amplification and cloning**

**1<sup>st</sup> Amplification**

Forward: 5'-aagcaagagatagggataag -3'

Reverse: 5'-cgatcaagataagtctctc -3'

**2<sup>nd</sup> Amplification (with *attB* sequence)**

Forward: 5'-**ggggacaagtttgtacaaaaagcaggct**gaagaggaggaagaaggagg-3'

Reverse: 5'-**ggggaccactttgtacaagaaagctgggt**ccctcttctctctctcc -3'

**Primers used for GST2 amplification and cloning**

**1<sup>st</sup> Amplification**

Forward: 5'-tagtagaacagaatggtctg -3'

Reverse: 5'-gttgaaccatttcaagtaat -3'

**2<sup>nd</sup> Amplification (with *attB* sequence)**

Forward: 5'-**ggggacaagtttgtacaaaaagcaggct**catgatgtagcagatcaac -3'

Reverse: 5'-**ggggaccactttgtacaagaaagctgggt**gctcctcaagagttctttag -3'

**Figure S7 Sequence of *OsMADS26* cDNA, GST1 and GST2 position in 5' and 3'-UTR and primer sequences used for PCR amplification.**

In bold: GST sequences cloned in pANDA vector and used for RNA interference induction; underlined: nested primers used for amplification of GST1 and GST2; Underlined capitals: primers used for the amplification of the cDNA sequence cloned in PC5300.OE vector for *OsMADS26* overexpression; Capitals: primers used for the analysis of *OsMADS26* expression by RT-qPCR in transgenic plants. In italic: Open reading frame (ORF), in italic, capital and bold: start and stop codons. In grey: BP recombination sequence (gateway cloning technology of INVITROGEN).
